# Supplementary material
Source: Springer Nature journal article supplement (https://link.springer.com/content/esm/art:10.1186/1471-2148-11-249/file/MediaObjects/12862_2011_1861_MOESM1_ESM.pdf)
Supplement: MOESM1 [file 12862_2011_1861_MOESM1_ESM.pdf]

**Additional file 1. List of species/strains used in this study and relevant information pertaining to them.** GenBank accession numbers are given for each genomic region analysed in this study. Sequences retrieved from the CBS culture collection database ('CBS seq.') or from genome projects ('JGI genome') are indicated. Mating behaviour as originally determined by classical mating tests ('old') and as now reassigned based on the molecular data ('new') is indicated when needed: A1, A2, As and Sf stands for mating type A1, A2, asexual and self-fertile strains, respectively. The "molecular mating type" as identified by PCR detection of the pheromone receptor alleles *STE3.A1* and *STE3.A2* is depicted by yellow and blue circles, respectively. White circles indicate strains for which PCR detection produced negative results and 'n.d.' stands for 'not determined'. Strains highlighted in **boldface** were used in the figure 1 and those indicated by thick-lined blue or yellow circles were used in figure 2. Sequences accession number of the *HD1/HD2* alleles used in Figures 4b and 4c are also highlighted in **boldface**. Abbreviations: *Rhodospiridium* (R.), *Rhodotorula* (Rh.), *Sporidiobolus* (S.), *Sporobolomyces* (Sp.), Type strain (T), Lectotype (LT), Authentic strain (AUT). Undescribed species included in this study are shadowed in light yellow and those for which no molecular mating type was accessed are shadowed in gray.

| Species            | Strains                     | D1/D2 LSU<br>(GenBank) | ITS region<br>(GenBank) | Mating<br>behaviour |     | <i>STE3</i><br>A1 | <i>STE3</i><br>A2 | <i>STE3.A1</i><br>(GenBank) | <i>STE3.A2</i><br>(GenBank) | <i>HD1/HD2</i><br>(GenBank) | Isolation source and location                               |
|--------------------|-----------------------------|------------------------|-------------------------|---------------------|-----|-------------------|-------------------|-----------------------------|-----------------------------|-----------------------------|-------------------------------------------------------------|
|                    |                             |                        |                         | Old                 | New |                   |                   |                             |                             |                             |                                                             |
| <i>R. babjevae</i> | A122                        |                        |                         | As                  |     | ●                 |                   |                             |                             | <b>HM143851</b>             | Seawater, South of Portugal                                 |
| <i>R. babjevae</i> | A125                        |                        |                         | As                  |     | ●                 |                   |                             |                             |                             | Seawater, South of Portugal                                 |
| <i>R. babjevae</i> | A267                        |                        |                         | As                  |     | ●                 |                   |                             |                             |                             | Seawater, South of Portugal                                 |
| <i>R. babjevae</i> | A270                        |                        |                         | As                  |     | ●                 |                   |                             |                             |                             | Seawater, South of Portugal                                 |
| <i>R. babjevae</i> | CBS 322                     |                        |                         | As                  |     | ●                 |                   |                             |                             |                             | Water supply of brewery, Germany                            |
| <i>R. babjevae</i> | CBS 2366                    |                        |                         | As                  |     |                   | ●                 |                             |                             | <b>JN246619</b>             | Air, Japan                                                  |
| <i>R. babjevae</i> | CBS 6020                    |                        |                         | As                  |     | ●                 |                   |                             |                             | <b>JN246620</b>             | Soil from drill core, Japan                                 |
| <i>R. babjevae</i> | <b>CBS 7808<sup>T</sup></b> | AF070420               | AF444542                | A1                  |     | ●                 |                   | JN246636                    |                             | <b>HM143857</b>             | Herbaceous plant, Moscow, Russia                            |
| <i>R. babjevae</i> | <b>CBS 7809</b>             | AF389828               | AF387773                | A2                  |     |                   | ●                 |                             | JN246573                    | <b>HM143856</b>             | Herbaceous plant, Moscow, Russia                            |
| <i>R. babjevae</i> | CBS 9071                    |                        |                         | A2                  |     |                   | ●                 |                             |                             | <b>JN246621</b>             | Barley kernels, North Dakota, USA                           |
| <i>R. babjevae</i> | CBS 9072                    |                        |                         | As                  |     |                   | ●                 |                             | JN246575                    | <b>HM143852</b>             | Barley kernels, North Dakota, USA                           |
| <i>R. babjevae</i> | CRUB 1025                   |                        |                         | A1                  |     | ●                 |                   |                             |                             | <b>JN246614</b>             | Nahuel Huapi, Patagonia, Argentina                          |
| <i>R. babjevae</i> | CRUB 1033                   |                        |                         | Sf                  |     |                   | ●                 |                             |                             | JN246615                    | Verde Lagoon, Patagonia, Argentina                          |
| <i>R. babjevae</i> | CRUB 1034                   |                        |                         | As                  |     | ●                 |                   |                             |                             | <b>JN246616</b>             | Verde Lagoon, Patagonia, Argentina                          |
| <i>R. babjevae</i> | CRUB 1037                   |                        |                         | As                  |     | ●                 |                   |                             |                             | HM143854                    | Fonk Lake, Patagonia, Argentina                             |
| <i>R. babjevae</i> | CRUB 1113                   |                        |                         | As                  |     |                   | ●                 |                             |                             |                             | Verde Lagoon, Patagonia, Argentina                          |
| <i>R. babjevae</i> | PTZ 001                     |                        |                         | A1                  |     | ●                 |                   | JN246641                    |                             |                             | Herbaceous plant, Prioksko-terrasny reserve, Moscow, Russia |
| <i>R. babjevae</i> | PTZ 111                     |                        |                         | A1                  |     | ●                 |                   |                             |                             |                             | Herbaceous plant, Prioksko-terrasny reserve, Moscow, Russia |
| <i>R. babjevae</i> | PYCC 4651                   |                        |                         | As                  |     | ●                 |                   |                             |                             |                             | Leaf, Estoril, Portugal                                     |
| <i>R. babjevae</i> | PYCC 4777                   |                        |                         | As                  |     | ●                 |                   | JN246638                    |                             | <b>HM143855</b>             | Flower, Oeiras, Portugal                                    |

| Species                     | Strains                      | D1/D2 LSU<br>(GenBank) | ITS region<br>(GenBank) | Mating<br>behaviour |     | STE3<br>A1 | STE3<br>A2 | STE3.A1<br>(GenBank) | STE3.A2<br>(GenBank) | HD1/HD2<br>(GenBank) | Isolation source and location                                                                                |
|-----------------------------|------------------------------|------------------------|-------------------------|---------------------|-----|------------|------------|----------------------|----------------------|----------------------|--------------------------------------------------------------------------------------------------------------|
|                             |                              |                        |                         | Old                 | New |            |            |                      |                      |                      |                                                                                                              |
| <i>R. babjevae</i>          | <b>PYCC 4915</b>             | AF389825               | AF387770                | As                  |     | ●          |            | JN246639             |                      | <b>HM143853</b>      | Pond water, Silwood, UK                                                                                      |
| <i>R. babjevae</i>          | VKM Y-1310                   |                        |                         | A1                  |     | ●          |            | JN246640             |                      | JN246617             | Silage, Kiev region, Ukraine                                                                                 |
| <i>R. babjevae</i>          | VKM Y-1629                   |                        |                         | A2                  |     |            | ●          |                      |                      | <b>JN246618</b>      | Soil, Krasnodar region, Russia                                                                               |
| <i>R. babjevae</i>          | VKM Y-1631                   |                        |                         | A2                  |     |            | ●          |                      |                      |                      | Soil, Krasnodar region, Russia                                                                               |
| <i>R. babjevae</i>          | VKM Y-2911                   |                        |                         | Sf                  |     | ●          | ●          | JN246637             | JN246574             |                      | Soil, Komi Republic, Russia                                                                                  |
| <i>Rh. graminis</i>         | AJ 130                       |                        |                         | As                  |     |            | ●          |                      | JN246578             | <b>JN246634</b>      | Soil in <i>Nothofagus</i> forest, Tongario National Park, New Zealand                                        |
| <i>Rh. graminis</i>         | AJ 132                       |                        |                         | As                  |     |            | ●          |                      |                      | <b>JN246635</b>      | Soil in <i>Podocarpus</i> forest, Pureora Forest Park, New Zealand                                           |
| <i>Rh. graminis</i>         | <b>CBS 2826<sup>T</sup></b>  | AF070431               | AF444505                | As                  |     |            | ●          |                      | JN246576             | <b>JN246632</b>      | Grass, New Zealand                                                                                           |
| <i>Rh. graminis</i>         | <b>CBS 3043</b>              | AF387130               | AF387780                | As                  |     |            | ●          |                      | JN246577             | <b>JN246633</b>      | Leaf of <i>Citrus</i> sp., Indonesia                                                                         |
| <i>Rh. graminis</i>         | WP1                          |                        |                         | n.d.                |     |            | ●          |                      | JGI Genome           | <b>JGI Genome</b>    | Isolated as an endophyte within <i>Populus trichocarpa</i> (black cottonwood), Western Washington state, USA |
| <i>Rh. glutinis</i>         | <b>C13A1</b>                 | JN246532               | JN246543                | As                  |     | ●          |            | JN246643             |                      | <b>JN246631</b>      | Fruiting body of <i>Cyttaria hariotii</i> , Patagonia, Argentina                                             |
| <i>Rh. glutinis</i>         | <b>CBS 20<sup>T</sup></b>    | AF070430               | AF387775                | As                  |     | ●          |            | JN246644             |                      | <b>JN246626</b>      | Air, unknown location                                                                                        |
| <i>Rh. glutinis</i>         | CBS 2367                     |                        |                         | As                  |     | ●          |            | JN246647             |                      | <b>JN246627</b>      | Fruit of <i>Phyllocladon</i> sp., Botanic Garden, Florence, Italy                                            |
| <i>Rh. glutinis</i>         | <b>JCM 3907</b>              | DQ531948               | AB073237                | As                  |     | ●          |            | JN246642             |                      | JN246628             | Unknown                                                                                                      |
| <i>Rh. glutinis</i>         | PYCC 4107                    |                        |                         | As                  |     | ●          |            | JN246646             |                      | JN246629             | Seawater, Florida, USA                                                                                       |
| <i>Rh. glutinis</i>         | <b>PYCC 5599</b>             | AF387132               | AF387777                | As                  |     | ●          |            | JN246645             |                      | JN246630             | Core samples from stratigraphic drillings, Japan                                                             |
| <i>R. diobovatum</i>        | CBS 324                      |                        |                         | A1                  |     | ●          |            | JN246649             |                      | JN246623             | Unknown substrate, Portugal                                                                                  |
| <i>R. diobovatum</i>        | <b>CBS 6084</b>              | AF189914               | AB073236                | A2                  |     |            | ●          |                      | JN246579             | JN246624             | Seawater, South-eastern barrier reef, Florida, USA                                                           |
| <i>R. diobovatum</i>        | <b>CBS 6085<sup>T</sup></b>  | AF070421               | AF387782                | A1                  |     | ●          |            | JN246648             |                      | JN246625             | Seawater, South-eastern barrier reef, Florida, USA                                                           |
| <i>R. diobovatum</i>        | PYCC 2920                    |                        |                         | A2                  |     |            | ●          |                      | JN246580             | JN246622             | Seawater, Scripps pier, USA                                                                                  |
| " <i>Rh. pinicorticis</i> " | <b>PYCC 4826<sup>T</sup></b> | AF387134               | JN246544                | As                  |     | ○          | ○          |                      |                      |                      | Bark of <i>Pinus pinaster</i> , Sesimbra, Portugal                                                           |
| <i>R. kratochvilovae</i>    | A113                         |                        |                         | As                  |     |            | ●          |                      |                      |                      | Under thermocline, Algarve, Portugal                                                                         |
| <i>R. kratochvilovae</i>    | CBS 7293                     |                        |                         | Sf                  |     | ●          | ●          |                      |                      |                      | Unknown                                                                                                      |
| <i>R. kratochvilovae</i>    | <b>CBS 7436<sup>T</sup></b>  | AF071436               | AF444520                | Sf                  |     | ●          | ●          | JN246651             | JN246584             |                      | Unknown                                                                                                      |
| <i>R. kratochvilovae</i>    | CRUB 0014                    |                        |                         | As                  |     | ●          |            | JN246652             |                      |                      | <i>Rubus idaeus</i> , Patagonia, Argentina                                                                   |
| <i>R. kratochvilovae</i>    | CRUB 0121                    |                        |                         | A2                  |     |            | ●          |                      |                      |                      | Lake Toncek, Argentina                                                                                       |

| Species                                                                                                                                                                                                                                                                                                                                                                                                                 | Strains                      | D1/D2 LSU<br>(GenBank) | ITS region<br>(GenBank) | Mating<br>behaviour |     | STE3<br>A1 | STE3<br>A2 | STE3.A1<br>(GenBank) | STE3.A2<br>(GenBank) | HD1/HD2<br>(GenBank) | Isolation source and location                                                |
|-------------------------------------------------------------------------------------------------------------------------------------------------------------------------------------------------------------------------------------------------------------------------------------------------------------------------------------------------------------------------------------------------------------------------|------------------------------|------------------------|-------------------------|---------------------|-----|------------|------------|----------------------|----------------------|----------------------|------------------------------------------------------------------------------|
|                                                                                                                                                                                                                                                                                                                                                                                                                         |                              |                        |                         | Old                 | New |            |            |                      |                      |                      |                                                                              |
| <i>R. kratochvilovae</i>                                                                                                                                                                                                                                                                                                                                                                                                | CRUB 1035                    |                        |                         | A2                  |     |            | ●          |                      | JN246583             |                      | Lake Escondido, Argentina                                                    |
| <i>R. kratochvilovae</i>                                                                                                                                                                                                                                                                                                                                                                                                | PYCC 4776                    |                        |                         | A2                  |     |            | ●          |                      |                      |                      | Plant leaf, Oeiras, Portugal                                                 |
| <i>R. kratochvilovae</i>                                                                                                                                                                                                                                                                                                                                                                                                | PYCC 4785                    |                        |                         | A2                  |     |            | ●          |                      | JN246585             |                      | Humus, Arrábida, Portugal                                                    |
| <i>R. kratochvilovae</i>                                                                                                                                                                                                                                                                                                                                                                                                | <b>PYCC 4818</b>             | AF1899116              | AF444586                | A1                  |     | ●          |            | JN246653             |                      |                      | Wood chips, Setúbal, Portugal                                                |
| <i>R. kratochvilovae</i>                                                                                                                                                                                                                                                                                                                                                                                                | <b>PYCC 4819</b>             | AF189917               | AF444587                | A2                  |     |            | ●          |                      | JN246581             |                      | Moss, Oeiras, Portugal                                                       |
| <i>R. kratochvilovae</i>                                                                                                                                                                                                                                                                                                                                                                                                | PYCC 5068                    |                        |                         | A2                  |     |            | ●          |                      |                      |                      | Soil, Azores, Portugal                                                       |
| <i>R. kratochvilovae</i>                                                                                                                                                                                                                                                                                                                                                                                                | PYCC 5085                    |                        |                         | A2                  |     |            | ●          |                      | JN246582             |                      | Soil, Azores, Portugal                                                       |
| <i>R. kratochvilovae</i>                                                                                                                                                                                                                                                                                                                                                                                                | PYCC 5244                    |                        |                         | A1                  |     | ●          |            | JN246650             |                      |                      | Culture contaminant, Oeiras, Portugal                                        |
| <i>Rh. araucariae</i>                                                                                                                                                                                                                                                                                                                                                                                                   | <b>CBS 6031<sup>T</sup></b>  | AF070427               | AF444510                | As                  |     |            | ●          |                      | JN246586             |                      | Rotting bark of <i>Araucaria araucana</i> (monkey-puzzle tree) Llaima, Chile |
| <i>Rh. araucariae</i>                                                                                                                                                                                                                                                                                                                                                                                                   | CBS 7797                     |                        |                         | As                  |     |            | ●          |                      | JN246587             |                      | Unknown                                                                      |
| <i>Rh. araucariae</i>                                                                                                                                                                                                                                                                                                                                                                                                   | <b>PYCC 4820</b>             | AF387135               | JN246545                | As                  |     | ●          | ●          | JN246654             | JN246588             |                      | Plant litter, Oeiras, Portugal                                               |
| <i>Rh. araucariae</i>                                                                                                                                                                                                                                                                                                                                                                                                   | PYCC 4821                    |                        |                         | As                  |     |            | ●          |                      |                      |                      | Humus, Arrábida Natural Park, Portugal                                       |
| <i>Rh. araucariae</i>                                                                                                                                                                                                                                                                                                                                                                                                   | ZP 280                       |                        |                         | As                  |     |            | ●          |                      |                      |                      | Plant litter, Sintra, Portugal                                               |
| <i>"Rh. hamamotoiana"</i>                                                                                                                                                                                                                                                                                                                                                                                               | <b>PYCC 4724</b>             | AF387137               | JN246547                | As                  |     |            | ●          |                      | JN246589             |                      | Soil, Alentejo, Portugal                                                     |
| <i>"Rh. hamamotoiana"</i>                                                                                                                                                                                                                                                                                                                                                                                               | <b>PYCC 4824<sup>T</sup></b> | AF387138               | JN246546                | As                  |     | ●          |            | JN246656             |                      |                      | Rotten wood, Gerês, Portugal                                                 |
| <i>"Rh. sesimbrana"</i>                                                                                                                                                                                                                                                                                                                                                                                                 | <b>PYCC 4691<sup>T</sup></b> | AF387144               | JN246548                | As                  |     | ●          |            | JN246657             |                      |                      | Bark of <i>Pinus pinaster</i> , Sesimbra, Portugal                           |
| <i>R. paludigenum</i>                                                                                                                                                                                                                                                                                                                                                                                                   | CBS 4477                     |                        |                         | A2 <sup>(a)</sup>   |     | ●          |            | JN246658             |                      |                      | Sea-water, Biscayne Bay, Florida, USA                                        |
| <i>R. paludigenum</i>                                                                                                                                                                                                                                                                                                                                                                                                   | CBS 6565                     |                        |                         | A1 <sup>(a)</sup>   |     |            | ●          |                      | JN246591             |                      | <i>Rhizophora mangle</i> (mangrove), swamp, Southern Florida, USA            |
| <i>R. paludigenum</i>                                                                                                                                                                                                                                                                                                                                                                                                   | <b>CBS 6566<sup>T</sup></b>  | AF363640               | AF363640                | A2                  |     |            | ●          |                      | JN246590             |                      | <i>Juncus roemerianus</i> (black rush), marsh, Florida, USA                  |
| <i>R. paludigenum</i>                                                                                                                                                                                                                                                                                                                                                                                                   | <b>CBS 6567</b>              | AF070424               | AF444493                | A1                  |     | ●          |            | JN246659             |                      |                      | <i>Rhizophora mangle</i> (mangrove), swamp, Southern Florida, USA            |
| <sup>(a)</sup> The molecular mating type of strains CBS 4477 and CBS 6565 is not in agreement with the original mating type designation. However, when crossing CBS 6566 <sup>T</sup> and CBS 4474 a positive result was obtained, indicating that the analysed strains are in fact of opposite mating types. A confirmation of this result is needed for the original strains deposited at the CBS culture collection. |                              |                        |                         |                     |     |            |            |                      |                      |                      |                                                                              |
| <i>R. toruloides</i>                                                                                                                                                                                                                                                                                                                                                                                                    | A405                         |                        |                         | A2                  |     |            | ●          |                      | JN246596             |                      | Rio Tinto, Spain                                                             |
| <i>R. toruloides</i>                                                                                                                                                                                                                                                                                                                                                                                                    | A421                         |                        |                         | A1                  |     | ●          |            |                      |                      |                      | Rio Tinto, Spain                                                             |
| <i>R. toruloides</i>                                                                                                                                                                                                                                                                                                                                                                                                    | <b>CBS 14</b>                | AF207884               | AB049028                | A1                  |     | ●          |            | JN246660             |                      |                      | Wood pulp from Coniferae, Sweden                                             |
| <i>R. toruloides</i>                                                                                                                                                                                                                                                                                                                                                                                                    | CBS 315                      |                        |                         | A1                  |     | ●          |            | JN246663             |                      |                      | Tokyo, Japan (type strain of <i>Rhodotorula rubescens</i> )                  |
| <i>R. toruloides</i>                                                                                                                                                                                                                                                                                                                                                                                                    | CBS 350                      |                        |                         | A1                  |     | ●          |            |                      |                      |                      | Wood pulp from conifer, Sweden                                               |

| Species                 | Strains                      | D1/D2 LSU<br>(GenBank) | ITS region<br>(GenBank) | Mating<br>behaviour |     | STE3<br>A1 | STE3<br>A2 | STE3.A1<br>(GenBank) | STE3.A2<br>(GenBank) | HD1/HD2<br>(GenBank) | Isolation source and location                                            |
|-------------------------|------------------------------|------------------------|-------------------------|---------------------|-----|------------|------------|----------------------|----------------------|----------------------|--------------------------------------------------------------------------|
|                         |                              |                        |                         | Old                 | New |            |            |                      |                      |                      |                                                                          |
| <i>R. toruloides</i>    | CBS 5745                     |                        |                         | A2                  |     |            | ●          |                      | JN246594             |                      | Soil, Nishiyama oil field, Japan                                         |
| <i>R. toruloides</i>    | <b>CBS 6016<sup>T</sup></b>  | CBS seq.               | CBS seq.                | Sf                  |     | ●          | ●          | JN246662             | JN246595             |                      | Unknown, [Hybrid]: cross of IFO 0559 x IFO 0880 (CBS 14 X CBS 349)       |
| <i>R. toruloides</i>    | PYCC 4350                    |                        |                         | A2                  |     |            | ●          |                      |                      |                      | Unknown                                                                  |
| <i>R. toruloides</i>    | PYCC 4661                    |                        |                         | A2                  |     |            | ●          |                      |                      |                      | Woodland soil, Alentejo, Portugal                                        |
| <i>R. toruloides</i>    | PYCC 4786                    |                        |                         | A2                  |     |            | ●          |                      |                      |                      | Dry leaf, Jardim Botânico, Rio de Janeiro, Brasil                        |
| <i>R. toruloides</i>    | PYCC 4943                    |                        |                         | A2                  |     |            | ●          |                      |                      |                      | Pond of solar saltern, Alcochete, Portugal                               |
| <i>R. toruloides</i>    | <b>PYCC 5081</b>             | JN246533               | JN246549                | A2                  |     |            | ●          |                      | JN246593             |                      | Soil, Azores, Portugal                                                   |
| <i>R. toruloides</i>    | PYCC 5082                    |                        |                         | A1                  |     | ●          |            | JN246661             |                      |                      | Soil, Azores, Portugal                                                   |
| <i>R. toruloides</i>    | PYCC 5109                    |                        |                         | A2                  |     |            | ●          |                      | JN246592             |                      | Salt farm, Alcochete, Portugal                                           |
| <i>R. toruloides</i>    | SDY 231                      |                        |                         | A1                  |     | ●          |            |                      |                      |                      | Acidic mine water, S. Domingos, Portugal                                 |
| <i>Rh. dairenensis</i>  | <b>CBS 2202</b>              | JN246535               | JN246550                | As                  |     | ○          |            |                      |                      |                      | Soil, USA                                                                |
| <i>Rh. dairenensis</i>  | <b>CBS 4406<sup>LT</sup></b> | AF070429               | AF444501                | As                  |     |            | ●          |                      | JN246597             |                      | Air, unknown location                                                    |
| <i>Rh. dairenensis</i>  | CBS 7294                     |                        |                         | As                  |     | ○          |            |                      |                      |                      | Unknown                                                                  |
| <i>Rh. dairenensis</i>  | <b>PYCC 4784</b>             | AY033551               | AF444683                | As                  |     |            | ●          |                      | JN246598             |                      | Plant litter, Arrábida, Portugal                                         |
| <i>Rh. dairenensis</i>  | PYCC 4897                    |                        |                         | As                  |     |            | ●          |                      |                      |                      | Flower of <i>Canna indica</i> , Azores, Portugal                         |
| <i>Rh. dairenensis</i>  | PYCC 4944                    |                        |                         | As                  |     |            | ●          |                      |                      |                      | Salt farm, Alcochete, Portugal                                           |
| <i>Rh. dairenensis</i>  | PYCC 5601                    |                        |                         | As                  |     | ○          |            |                      |                      |                      | Core samples from stratigraphic drillings, Japan                         |
| <i>Rh. mucilaginosa</i> | <b>CBS 17</b>                | AF189960               | AF444503                | As                  |     | ○          | ○          |                      |                      |                      | Unknown                                                                  |
| <i>Rh. mucilaginosa</i> | <b>CBS 316<sup>T</sup></b>   | AF070432               | AF444541                | As                  |     | ○          | ○          |                      |                      |                      | Unknown                                                                  |
| <i>Rh. mucilaginosa</i> | CBS 325                      |                        |                         | As                  |     | ○          | ○          |                      |                      |                      | Air, Tokyo, Japan                                                        |
| <i>Rh. mucilaginosa</i> | CBS 326                      |                        |                         | As                  |     | ○          | ○          |                      |                      |                      | Air, unknown location                                                    |
| <i>Rh. mucilaginosa</i> | CBS 992                      |                        |                         | As                  |     | ○          | ○          |                      |                      |                      | Nail of 12-year-old girl, Austria                                        |
| <i>Rh. mucilaginosa</i> | CBS 1011                     |                        |                         | As                  |     | ○          | ○          |                      |                      |                      | Ulcer of man, Madagascar                                                 |
| <i>Rh. mucilaginosa</i> | CBS 2377                     |                        |                         | As                  |     | ○          | ○          |                      |                      |                      | Skin, scrapings from axillary region of man,                             |
| <i>Rh. mucilaginosa</i> | CBS 2404                     |                        |                         | As                  |     | ○          | ○          |                      |                      |                      | Fermenting Kentucky tobacco, Salerno, Italy                              |
| <i>Rh. mucilaginosa</i> | CBS 5804                     |                        |                         | As                  |     | ○          | ○          |                      |                      |                      | Larvae of <i>Drosophila pilimanae</i> (fruit fly), Hawaii, USA           |
| <i>Rh. mucilaginosa</i> | CBS 5951                     |                        |                         | As                  |     | ○          | ○          |                      |                      |                      | Gut of <i>Guara rubra</i> (red ibis bird), Paris Zoological Park, France |

| Species                                                                                                                                                                                                                                     | Strains                     | D1/D2 LSU<br>(GenBank) | ITS region<br>(GenBank) | Mating<br>behaviour |     | STE3<br>A1 | STE3<br>A2 | STE3.A1<br>(GenBank) | STE3.A2<br>(GenBank) | HD1/HD2<br>(GenBank) | Isolation source and location                                     |
|---------------------------------------------------------------------------------------------------------------------------------------------------------------------------------------------------------------------------------------------|-----------------------------|------------------------|-------------------------|---------------------|-----|------------|------------|----------------------|----------------------|----------------------|-------------------------------------------------------------------|
|                                                                                                                                                                                                                                             |                             |                        |                         | Old                 | New |            |            |                      |                      |                      |                                                                   |
| <i>Rh. pacifica</i>                                                                                                                                                                                                                         | <b>SY-246</b>               | AB193175               | AB193175                | A1                  |     | ○          | ○          |                      |                      |                      | Sediments, deep-sea floor (900 m), Iheya Ridge, Pacific Ocean     |
| <i>Rh. pacifica</i>                                                                                                                                                                                                                         | <b>SY-96<sup>T</sup></b>    | AB026006               | AB026006                | A2                  |     | ○          | ○          |                      |                      |                      | Sediments, deep-sea floor (3700 m), Yap Trench, Pacific Ocean     |
| <i>R. sphaerocarpum</i>                                                                                                                                                                                                                     | <b>CBS 5939<sup>T</sup></b> | AF070425               | AF444499                | A2                  | A1  | ○          | ○          |                      |                      |                      | Seawater, Marguerite Bay, Antarctica                              |
| <i>R. sphaerocarpum</i>                                                                                                                                                                                                                     | CBS 5940                    |                        |                         | A1                  | A2  | ○          | ○          |                      |                      |                      | Seawater, Gerlache Straits near Anvers Island, Antarctica         |
| <i>R. sphaerocarpum</i>                                                                                                                                                                                                                     | <b>CBS 5941</b>             | AF189919               | AB073259                | Sf                  |     | ○          | ○          |                      |                      |                      | Sea water, Gerlache Straits near Brabant Island, Antarctica       |
| <i>R. sphaerocarpum</i>                                                                                                                                                                                                                     | CBS 6985                    |                        |                         | A2                  | A1  | ○          | ○          |                      |                      |                      | Salt farm, Seto Inland Sea, Yoshima, Japan                        |
| <i>R. sphaerocarpum</i>                                                                                                                                                                                                                     | <b>PYCC 2988</b>            | JN246534               | JN246551                | A2 <sup>(b)</sup>   | A1  | ●          |            | JN246664             |                      |                      | Unknown                                                           |
| <i>R. sphaerocarpum</i>                                                                                                                                                                                                                     | PYCC 5105                   |                        |                         | A2                  | A1  | ○          | ○          |                      |                      |                      | Salt farm, Alcochete, Portugal                                    |
| <i>R. sphaerocarpum</i>                                                                                                                                                                                                                     | PYCC 5106                   |                        |                         | A2                  | A1  | ○          | ○          |                      |                      |                      | Salt farm, Alcochete, Portugal                                    |
| <i>R. sphaerocarpum</i>                                                                                                                                                                                                                     | PYCC 5107                   |                        |                         | A1                  | A2  | ○          | ○          |                      |                      |                      | Salt farm, Alcochete, Portugal                                    |
| <i>R. sphaerocarpum</i>                                                                                                                                                                                                                     | PYCC 5108                   |                        |                         | A1                  | A2  | ○          | ○          |                      |                      |                      | Salt farm, Alcochete, Portugal                                    |
| <i>R. sphaerocarpum</i>                                                                                                                                                                                                                     | ZP 417                      |                        |                         | A2                  | A1  | ○          | ○          |                      |                      |                      | Mud from salt marsh, Tróia, Portugal                              |
| <sup>(b)</sup> The molecular mating type of strain PYCC 2988 indicates that, despite originally designated as MAT A2, in fact is a MAT A1 strain. However, no positive results were obtained for the other strains of the same mating type. |                             |                        |                         |                     |     |            |            |                      |                      |                      |                                                                   |
| <i>Rh. taiwanensis</i>                                                                                                                                                                                                                      | BCRC 23118 <sup>T</sup>     | GU646863               | GUG46862                |                     |     | n.d.       | n.d.       |                      |                      |                      |                                                                   |
| " <i>Rh. pyritica</i> "                                                                                                                                                                                                                     | PYCC 4782                   |                        |                         | As                  |     | ○          | ○          |                      |                      |                      | Wood of <i>Quercus suber</i> , Arrábida, Portugal                 |
| " <i>Rh. pyritica</i> "                                                                                                                                                                                                                     | <b>PYCC 5597</b>            | AF387139               | JN246552                | As                  |     | ○          | ○          |                      |                      |                      | Unknown (IAM 12959)                                               |
| " <i>Rh. pyritica</i> "                                                                                                                                                                                                                     | RT 4.5.3                    |                        |                         | As                  |     | ○          | ○          |                      |                      |                      | Acidic water, Rio Tinto, Spain                                    |
| " <i>Rh. pyritica</i> "                                                                                                                                                                                                                     | <b>SDY 119<sup>T</sup></b>  | AY731799               | JN246553                | As                  |     | ○          | ○          |                      |                      |                      | Acid mine water, S. Domingos, Portugal                            |
| " <i>R. feracius</i> "                                                                                                                                                                                                                      | <b>PYCC 5380</b>            | AF387143               | JN246554                | As                  |     | ○          | ○          |                      |                      |                      | Soil, Azores, Portugal                                            |
| " <i>R. feracius</i> "                                                                                                                                                                                                                      | <b>SDY 020<sup>T</sup></b>  | AY731800               | JN246555                | Sf                  |     | ○          | ○          |                      |                      |                      | Acidic mine water, S. Domingos, Portugal                          |
| " <i>R. feracius</i> "                                                                                                                                                                                                                      | SDY 080                     |                        |                         | As                  |     | ○          | ○          |                      |                      |                      | Acidic mine water, S. Domingos, Portugal                          |
| " <i>R. feracius</i> "                                                                                                                                                                                                                      | SDY 176                     |                        |                         | Sf                  |     | ○          | ○          |                      |                      |                      | Acidic mine water, S. Domingos, Portugal                          |
| <i>R. azoricum</i>                                                                                                                                                                                                                          | <b>CBS 4648</b>             | DQ531944               | JN246556                | A1                  | A2  |            | ●          |                      | JN246600             |                      | Cacao, unknown location                                           |
| <i>R. azoricum</i>                                                                                                                                                                                                                          | <b>CBS 8948</b>             | AF321978               | CBS Seq.                | A2                  | A1  | ●          |            | JN246655             |                      |                      | Soil near thermal hot spring, São Miguel island, Azores, Portugal |
| <i>R. azoricum</i>                                                                                                                                                                                                                          | <b>CBS 8949<sup>T</sup></b> | AF321977               | CBS Seq.                | A1                  | A2  |            | ●          |                      | JN246599             |                      | Soil, São Miguel island, Azores, Portugal                         |
| <i>R. fluviale</i>                                                                                                                                                                                                                          | <b>CBS 6568<sup>T</sup></b> | AF189915               | AY015432                | Sf                  |     |            | ●          |                      | JN246601             |                      | Brackish water, near mouth of Miami river, Florida, USA           |

| Species                | Strains                       | D1/D2 LSU<br>(GenBank) | ITS region<br>(GenBank) | Mating<br>behaviour |     | STE3<br>A1 | STE3<br>A2 | STE3.A1<br>(GenBank) | STE3.A2<br>(GenBank) | HD1/HD2<br>(GenBank) | Isolation source and location                                                          |
|------------------------|-------------------------------|------------------------|-------------------------|---------------------|-----|------------|------------|----------------------|----------------------|----------------------|----------------------------------------------------------------------------------------|
|                        |                               |                        |                         | Old                 | New |            |            |                      |                      |                      |                                                                                        |
| <i>S. microsporus</i>  | <b>CBS 7041<sup>T</sup></b>   |                        |                         | Sf                  |     |            | ●          |                      | JN246602             |                      | Herbaceous culm, Jamaica                                                               |
| <i>S. ruineniae</i>    | <b>CBS 5004</b>               | AF387127               | JN246558                | A1                  | A2  | ○          | ○          |                      |                      |                      | Foliage of cacao tree ( <i>Theobroma cacao</i> ), Bogor, Indonesia                     |
| <i>S. ruineniae</i>    | CBS 5078                      |                        |                         | As                  |     | ○          | ○          |                      |                      |                      | Foliage of cacao tree ( <i>Theobroma cacao</i> ), Bogor, Indonesia                     |
| <i>S. ruineniae</i>    | <b>CBS 5811</b>               | AF070434               | AB030339                | As                  |     | ○          | ○          |                      |                      |                      | Dung of goat, Pakistan                                                                 |
| <i>S. ruineniae</i>    | <b>CBS 9111</b>               | AF387128               | JN246557                | A2                  | A1  | ●          |            | JN246665             |                      |                      | Garden soil, Taiwan                                                                    |
| <i>Sp. odoratus</i>    | <b>CBS 9115</b>               | AF387125               | CBS seq.                | As                  |     | ○          | ○          |                      |                      |                      | Basidiocarp of <i>Myxarium nucleatum</i> , Sesimbra, Portugal                          |
| <i>Sp. odoratus</i>    | <b>ZP 470</b>                 | JN246540               | JN246559                | As                  |     | ○          | ○          |                      |                      |                      | Culture contaminant, Caparica, Portugal                                                |
| <i>Sp. poonsookiae</i> | <b>CBS 9095<sup>T</sup></b>   | AF387124               | AB030327                | As                  |     | n.d.       | n.d.       |                      |                      |                      | Dead leaf of <i>Mangifera indica</i> , Bangkok, Thailand                               |
| <i>Sp. nylandii</i>    | <b>CBS 9093<sup>T</sup></b>   | AF387123               | AB030323                | As                  |     | n.d.       | n.d.       |                      |                      |                      | Dead leaf of <i>Oryza sativa</i> , Bangkok, Thailand                                   |
| " <i>R. oreadum</i> "  | <b>ZP 292<sup>T</sup></b>     | JN246537               | JN246560                | A1                  |     | ●          |            | JN246666             |                      |                      | Soil under snow, Serra da Estrela, Portugal                                            |
| " <i>R. oreadum</i> "  | <b>ZP 295</b>                 | JN246538               | JN246561                | A2                  |     | ○          | ○          |                      |                      |                      | Soil under snow, Serra da Estrela, Portugal                                            |
| <i>Rh. colostri</i>    | A326                          |                        |                         | As                  |     |            | ●          |                      | JN246605             |                      | Olo river, Portugal                                                                    |
| <i>Rh. colostri</i>    | C18B1                         |                        |                         | As                  |     |            | ●          |                      |                      |                      | Fruiting body of <i>Cyttaria hariotii</i> , Patagonia, Argentina                       |
| <i>Rh. colostri</i>    | <b>C21C1</b>                  | JN246536               | JN246562                | As                  |     | ●          |            | JN246667             |                      |                      | Fruiting body of <i>Cyttaria hariotii</i> , Patagonia, Argentina                       |
| <i>Rh. colostri</i>    | <b>CBS 348<sup>T</sup></b>    | AY372177               | JN246563                | As                  |     |            | ●          |                      | JN246603             |                      | Colostrum from woman                                                                   |
| <i>Rh. colostri</i>    | CBS 2201                      |                        |                         | As                  |     |            | ●          |                      | JN246604             |                      | Unknown                                                                                |
| <i>Rh. colostri</i>    | CBS 9002                      |                        |                         | As                  |     | ●          |            | JN246668             |                      |                      | Flowering plant of <i>Helleborus foetidus</i> , Marburg, Germany                       |
| <i>Rh. colostri</i>    | ZP 970                        |                        |                         | As                  |     |            | ●          |                      |                      |                      | Leaves of <i>Nothofagus moorei</i> , Lamington National Park, Australia                |
| <i>Rh. colostri</i>    | ZP 984                        |                        |                         | As                  |     |            | ●          |                      |                      |                      | <i>Cyttaria gunnii</i> on <i>Nothofagus cunninghamii</i> , Mt. Field Park, Tasmania    |
| <i>Rh. colostri</i>    | ZP 985                        |                        |                         | As                  |     |            | ●          |                      |                      |                      | <i>Cyttaria gunnii</i> on <i>Nothofagus menziesii</i> , Lake Daniels, New Zealand      |
| <i>Rh. colostri</i>    | ZP 986                        |                        |                         | As                  |     |            | ●          |                      |                      |                      | <i>Cyttaria gunnii</i> on <i>Nothofagus menziesii</i> (floor), Hasst Pass, New Zealand |
| <i>R. lusitaniae</i>   | <b>CBS 7604<sup>T</sup></b>   | AF070423               | AY015430                | Sf                  |     |            | ●          |                      | JN246606             |                      | Soil of woodland, Lisbon, Portugal                                                     |
| <i>R. lusitaniae</i>   | PYCC 4599                     |                        |                         | Sf                  |     |            | ●          |                      | JN246607             |                      | Dried leaf material, Arrábida Natural Park, Portugal                                   |
| <i>R. lusitaniae</i>   | <b>PYCC 4642</b>              | JN246539               | AB087497                | Sf                  |     |            | ●          |                      | JN246608             |                      | Dried leaf material, Arrábida Natural Park, Portugal                                   |
| <i>Sp. ruberrimus</i>  | <b>CBS 7500<sup>AUT</sup></b> | AF070442               | AY070004                | As                  |     |            | ●          |                      | JN246609             |                      | Air, Fukuoka, Japan                                                                    |

| Species                   | Strains                       | D1/D2 LSU<br>(GenBank) | ITS region<br>(GenBank) | Mating<br>behaviour |     | STE3<br>A1 | STE3<br>A2 | STE3.A1<br>(GenBank) | STE3.A2<br>(GenBank) | HD1/HD2<br>(GenBank) | Isolation source and location                                                      |
|---------------------------|-------------------------------|------------------------|-------------------------|---------------------|-----|------------|------------|----------------------|----------------------|----------------------|------------------------------------------------------------------------------------|
|                           |                               |                        |                         | Old                 | New |            |            |                      |                      |                      |                                                                                    |
| <i>Sp. ruberrimus</i>     | <b>CRUB 1041</b>              | JN246541               | JN246564                | As                  |     | ●          |            | JN246669             |                      |                      | Aquatic environment, Patagonia, Argentina                                          |
| <i>Sp. phaffii</i>        | <b>CBS 9129<sup>T</sup></b>   | AY070011               | AY069995                | As                  |     | n.d.       | n.d.       |                      |                      |                      | Wilting leaf of <i>Nerium indicum</i> , Yunnan, China                              |
| <i>Sp. phaffii</i>        | <b>CH 2.049</b>               | AY070010               | AY069994                | As                  |     | n.d.       | n.d.       |                      |                      |                      | Wilting leaf of <i>Ehretia corylifolia</i> , Yunnan, China                         |
| <i>Sporobolomyces sp.</i> | <b>IAM 13481</b>              | JGI Genome             | JGI Genome              | n.d.                |     | ●          |            | JGI Genome           |                      |                      | Leaf of willow, Japan (identified as <i>Sporobolomyces roseus</i> )                |
| <i>S. pararoseus</i>      | <b>CBS 484</b>                | AF070437               | AF417115                | A1                  | A2  |            | ●          |                      | JN246610             |                      | Air, USA                                                                           |
| <i>S. pararoseus</i>      | <b>CBS 491<sup>T</sup></b>    | AF189977               | AY015429                | A2                  | A1  | ●          |            | JN246670             |                      |                      | Soil, Japan                                                                        |
| <i>S. pararoseus</i>      | CBS 499                       |                        |                         | A1                  | A2  |            | ●          |                      | JN246611             |                      | Air in dairy, USA                                                                  |
| <i>S. pararoseus</i>      | <b>CBS 7716</b>               | EU003452               | JN246565                | A2                  | A1  | ●          |            | JN246671             |                      |                      | Soil, USSR                                                                         |
| <i>Sp. patagonicus</i>    | <b>CBS 9657<sup>T</sup></b>   | AY158655               | AY552328                | As                  |     | n.d.       | n.d.       |                      |                      |                      | Subsurface water, lake Fonck, Patagonia, Argentina                                 |
| <i>Sp. patagonicus</i>    | <b>CBS 9658</b>               | AY158656               | AY552329                | As                  |     | n.d.       | n.d.       |                      |                      |                      | Subsurface water, lake Hess, Patagonia, Argentina                                  |
| <i>Sp. salmoneus</i>      | <b>CBS 488<sup>T</sup></b>    | AY070017               | AY070005                | As                  |     | n.d.       | n.d.       |                      |                      |                      | Etiolated grass, under a wooden plank, Delft, The Netherlands                      |
| <i>Sp. salmoneus</i>      | <b>CBS 4217<sup>T</sup></b>   | AF070440               | AY069993                | As                  |     | n.d.       | n.d.       |                      |                      |                      | Air, unknown location                                                              |
| <i>Sp. carnicolor</i>     | <b>CBS 4215<sup>AUT</sup></b> | AY158641               | AY069991                | As                  |     | n.d.       | n.d.       |                      |                      |                      | Unknown                                                                            |
| <i>Sp. japonicus</i>      | <b>CBS 5744<sup>T</sup></b>   | AY070009               | AY069992                | As                  |     | n.d.       | n.d.       |                      |                      |                      | Oil brine, Yabase oil field, Akita Prefecture, Japan                               |
| <i>Sp. bannaensis</i>     | <b>CBS 9204<sup>T</sup></b>   | AY274823               | AY274824                | As                  |     | n.d.       | n.d.       |                      |                      |                      | Leaf of <i>Theobroma cacao</i> , Xishuang Banna, Yunnan, China                     |
| <i>Sp. beijingensis</i>   | <b>CBS 9730<sup>T</sup></b>   |                        | AY364837                | As                  |     | n.d.       | n.d.       |                      |                      |                      | Wilting leaf of <i>Sorbus pohnuashanensis</i> , Baihua Mountain, Beijing, China    |
| <i>S. longiusculus</i>    | <b>CBS 9654<sup>T</sup></b>   | AY158657               | AY552327                | A1                  | A2  |            | ●          |                      | JN246612             |                      | Subsurface water, Fonck lake, Patagonia, Argentina                                 |
| <i>S. longiusculus</i>    | <b>CBS 9655</b>               | AY552326               | JN246566                | A2                  | A1  | ○          |            |                      |                      |                      | Subsurface water, Ilon lake, Patagonia, Argentina                                  |
| <i>S. longiusculus</i>    | CBS 9656                      |                        |                         | A2                  | A1  | ○          |            |                      |                      |                      | Subsurface water, Ilon lake, Patagonia, Argentina                                  |
| <i>Sp. blumeae</i>        | <b>CBS 9094<sup>T</sup></b>   | AY070007               | AB030331                | As                  |     | ●          |            | JN246672             |                      |                      | Dead leaf of <i>Blumea sp.</i> , Bangkok, Thailand                                 |
| <i>S. metaroseus</i>      | <b>CBS 5541</b>               | EU003458               | EU003480                | Sf                  |     | ●          |            | JN246673             |                      |                      | Flower of <i>Fumaria sp.</i> , France                                              |
| <i>S. metaroseus</i>      | <b>CBS 7683<sup>T</sup></b>   | EU003461               | EU003482                | Sf                  |     | ○          | ○          |                      |                      |                      | Leaves, Portugal                                                                   |
| <i>Sp. jilinensis</i>     | <b>CBS 9728<sup>T</sup></b>   | AY364838               |                         | As                  |     | ●          |            | JN246674             |                      |                      | Wilting leaf of <i>Pinus koraiensis</i> , Changbai Mountain, Jilin province, China |
| <i>S. johnsonii</i>       | CBS 1522                      |                        |                         | As                  | As  | ●          |            |                      |                      | GU474690             | Fodder yeast, Germany                                                              |
| <i>S. johnsonii</i>       | CBS 2630                      |                        |                         | A2                  | A1  | ●          |            |                      |                      |                      | Air, The Netherlands                                                               |
| <i>S. johnsonii</i>       | <b>CBS 2634</b>               | JN246542               | JN246567                | A1                  | A2  |            | ●          |                      | GU474647             | <b>GU474685</b>      | <i>Fragaria sp.</i> , Japan                                                        |

| Species                | Strains                     | D1/D2 LSU<br>(GenBank) | ITS region<br>(GenBank) | Mating<br>behaviour |     | STE3<br>A1 | STE3<br>A2 | STE3.A1<br>(GenBank) | STE3.A2<br>(GenBank) | HD1/HD2<br>(GenBank) | Isolation source and location                                                        |
|------------------------|-----------------------------|------------------------|-------------------------|---------------------|-----|------------|------------|----------------------|----------------------|----------------------|--------------------------------------------------------------------------------------|
|                        |                             |                        |                         | Old                 | New |            |            |                      |                      |                      |                                                                                      |
| <i>S. johnsonii</i>    | CBS 2643                    |                        |                         | A2                  | A1  | ●          |            |                      |                      |                      | Unknown substrate, Germany                                                           |
| <i>S. johnsonii</i>    | CBS 4209                    |                        |                         | A2                  | A1  | ●          |            |                      |                      |                      | Fruit body of <i>Exidia</i> sp., Japan                                               |
| <i>S. johnsonii</i>    | <b>CBS 5470<sup>T</sup></b> | AF070435               | AY015431                | Sf                  |     | ●          | ●          | GU474645             | GU474648             | <b>GU474692</b>      | Leaf of <i>Rubus idaeus</i> with dead pustule of <i>Phragmidium rubi-idaei</i> , USA |
| <i>S. johnsonii</i>    | <b>CBS 7795</b>             | EF592139               | EF592112                | As                  |     | ●          |            | HM133777             |                      |                      | Culture contaminant, Russia                                                          |
| <i>S. johnsonii</i>    | CBS 8241                    |                        |                         | Sf                  |     | ●          | ●          |                      |                      |                      | Unknown                                                                              |
| <i>S. johnsonii</i>    | PYCC 4351                   |                        |                         | A2                  | A1  | ●          |            | GU474644             |                      | <b>GU474689</b>      | Leaf of a tree, Portugal                                                             |
| <i>S. salmonicolor</i> | <b>CBS 483</b>              | EF592144               | EF592118                | A2                  | A1  | ●          |            | GU474642             |                      | <b>GU474673</b>      | Rusted leaf of <i>Citrus</i> sp., France                                             |
| <i>S. salmonicolor</i> | CBS 487                     |                        |                         | A1                  | A2  |            | ●          |                      |                      |                      | Air, Japan                                                                           |
| <i>S. salmonicolor</i> | <b>CBS 490<sup>T</sup></b>  | AF070439               | AY015434                | A1                  | A2  |            | ●          |                      | GU474641             | <b>GU474656</b>      | Culture contaminant                                                                  |
| <i>S. salmonicolor</i> | CBS 495                     |                        |                         | A1                  | A2  |            | ●          |                      |                      |                      | Culture contaminant, Japan                                                           |
| <i>S. salmonicolor</i> | CBS 496                     |                        |                         | A1                  | A2  |            | ●          |                      |                      | GU474658             | Scorched skin of orange, Delft, Netherlands                                          |
| <i>S. salmonicolor</i> | CBS 497                     |                        |                         | A2                  | A1  | ●          |            |                      |                      |                      | Unknown                                                                              |
| <i>S. salmonicolor</i> | CBS 1012                    |                        |                         | A1                  | A2  |            | ●          |                      | HM133782             | <b>GU474649</b>      | Leaf of <i>Aristolochia</i> sp., Botanic Laboratory, Delft, The Netherlands          |
| <i>S. salmonicolor</i> | CBS 1013                    |                        |                         | A1                  | A2  |            | ●          |                      |                      | <b>GU474650</b>      | Air in dairy, USA                                                                    |
| <i>S. salmonicolor</i> | CBS 1039                    |                        |                         | A1                  | A2  |            | ●          |                      |                      | GU474651             | Air in dairy, USA                                                                    |
| <i>S. salmonicolor</i> | CBS 2635                    |                        |                         | A1                  | A2  |            | ●          |                      |                      |                      | Infected skin of a man, Germany                                                      |
| <i>S. salmonicolor</i> | CBS 2641                    |                        |                         | As                  |     |            | ●          |                      |                      |                      | Air, Netherlands                                                                     |
| <i>S. salmonicolor</i> | CBS 2647                    |                        |                         | A2                  | A1  | ●          |            |                      |                      | GU474670             | Gut of <i>Drosophila</i> sp., locality unknown                                       |
| <i>S. salmonicolor</i> | CBS 2648                    |                        |                         | A2                  | A1  | ●          |            |                      |                      |                      | Exudate of <i>Kalopanax vicinifolium</i> var. <i>typicum</i> , Japan                 |
| <i>S. salmonicolor</i> | CBS 2873                    |                        |                         | A1                  | A2  |            | ●          |                      |                      |                      | Extract of oak bark, France                                                          |
| <i>S. salmonicolor</i> | CBS 4029                    |                        |                         | As                  |     |            | ●          |                      |                      |                      | Soil, New Zealand                                                                    |
| <i>S. salmonicolor</i> | CBS 4030                    |                        |                         | A1                  | A2  |            | ●          |                      |                      |                      | Soil, New Zealand                                                                    |
| <i>S. salmonicolor</i> | CBS 4474                    |                        |                         | A2                  | A1  | ●          |            | HM133770             |                      | <b>GU474672</b>      | Blistered skin of a man, Bonn, Germany                                               |
| <i>S. salmonicolor</i> | CBS 5937                    |                        |                         | A1                  | A2  |            | ●          |                      |                      |                      | Carious dentine, South Africa                                                        |
| <i>S. salmonicolor</i> | CBS 6322                    |                        |                         | A1                  | A2  |            | ●          |                      | HM133783             | <b>GU474660</b>      | Rotting wood shavings, Chile                                                         |
| <i>S. salmonicolor</i> | CBS 6470                    |                        |                         | A1                  | A2  |            | ●          |                      |                      |                      | Air, Germany                                                                         |
| <i>S. salmonicolor</i> | CBS 6529                    |                        |                         | A2                  | A1  | ●          |            |                      |                      |                      | Culture contaminant, R.J. Bandoni                                                    |
| <i>S. salmonicolor</i> | CBS 6530                    |                        |                         | A1                  | A2  |            | ●          |                      |                      |                      | Bog, locality unknown                                                                |



| Species                | Strains      | D1/D2 LSU<br>(GenBank) | ITS region<br>(GenBank) | Mating<br>behaviour |     | STE3<br>A1 | STE3<br>A2 | STE3.A1<br>(GenBank) | STE3.A2<br>(GenBank) | HD1/HD2<br>(GenBank) | Isolation source and location                             |
|------------------------|--------------|------------------------|-------------------------|---------------------|-----|------------|------------|----------------------|----------------------|----------------------|-----------------------------------------------------------|
|                        |              |                        |                         | Old                 | New |            |            |                      |                      |                      |                                                           |
| <i>S. salmonicolor</i> | CBS 6781     |                        |                         | A1                  | A2  |            | ●          |                      |                      |                      | Bituminous soil, oil field, Cumanà, Venezuela             |
| <i>S. salmonicolor</i> | CBS 6832     |                        |                         | A1                  | A2  |            | ●          |                      | GU474646             | <b>GU474664</b>      | Cerebro-spinal fluid, India                               |
| <i>S. salmonicolor</i> | CBS 7260     |                        |                         | A1                  | A2  |            | ●          |                      |                      | <b>GU474665</b>      | Slime flux of <i>Quercus pendunculata</i> , Russia        |
| <i>S. salmonicolor</i> | IHMT 2446/96 |                        |                         | A2                  | A1  | ●          |            |                      |                      | <b>GU474676</b>      | Skin lesion, Portugal                                     |
| <i>S. salmonicolor</i> | ML 2241      |                        |                         | A2                  | A1  | ●          |            | GU474643             |                      | <b>GU474678</b>      | Isolated by J. W. Fell                                    |
| <i>S. salmonicolor</i> | NRRL Y-17498 |                        |                         | A2                  | A1  | ●          |            |                      |                      |                      | Ice core, Greenland                                       |
| <i>S. salmonicolor</i> | PYCC 4558    |                        |                         | A2                  | A1  | ●          |            | HM133774             |                      | <b>GU474679</b>      | Polluted river water, Oeiras, Portugal                    |
| <i>S. salmonicolor</i> | PYCC 4623    |                        |                         | A2                  | A1  | ●          |            |                      |                      | GU474680             | Soil, USSR                                                |
| <i>S. salmonicolor</i> | PYCC 5245    |                        |                         | A1                  | A2  |            | ●          |                      |                      |                      | Unknown substrate, Portugal                               |
| <i>S. salmonicolor</i> | RJB 948      |                        |                         | A2                  | A1  | ●          |            |                      |                      |                      | Isolated by R. J. Bandoni                                 |
| <i>S. salmonicolor</i> | RJB 950      |                        |                         | A1                  | A2  |            | ●          |                      |                      |                      | Isolated by R. J. Bandoni                                 |
| <i>S. salmonicolor</i> | RJB 8219     |                        |                         | A1                  | A2  |            | ●          |                      |                      |                      | Isolated by R. J. Bandoni                                 |
| <i>S. salmonicolor</i> | ZP 392       |                        |                         | A1                  | A2  |            | ●          |                      |                      |                      | Fruit body of <i>Dacrymyces</i> sp., Germany              |
| <i>S. salmonicolor</i> | ZP 648       |                        |                         | A2                  | A1  | ●          |            |                      |                      | <b>GU474682</b>      | Leaf of <i>Ligustrum</i> sp., Monte de Caparica, Portugal |
